# Supplementary material for: Insights into the Genetic Relationships and Breeding Patterns of the African Tea Germplasm Based on nSSR Markers and cpDNA Sequences
Source: PubMed Central journal article supplement (PMC5004484; doi:10.3389/fpls.2016.01244), 2016-08-30
Supplement: Image1.pdf [file Image1.pdf]

- Cameroon
- Kenya
- Madagascar
- Malawi
- Nigeria
- Rwanda
- South Africa
- Tanzania

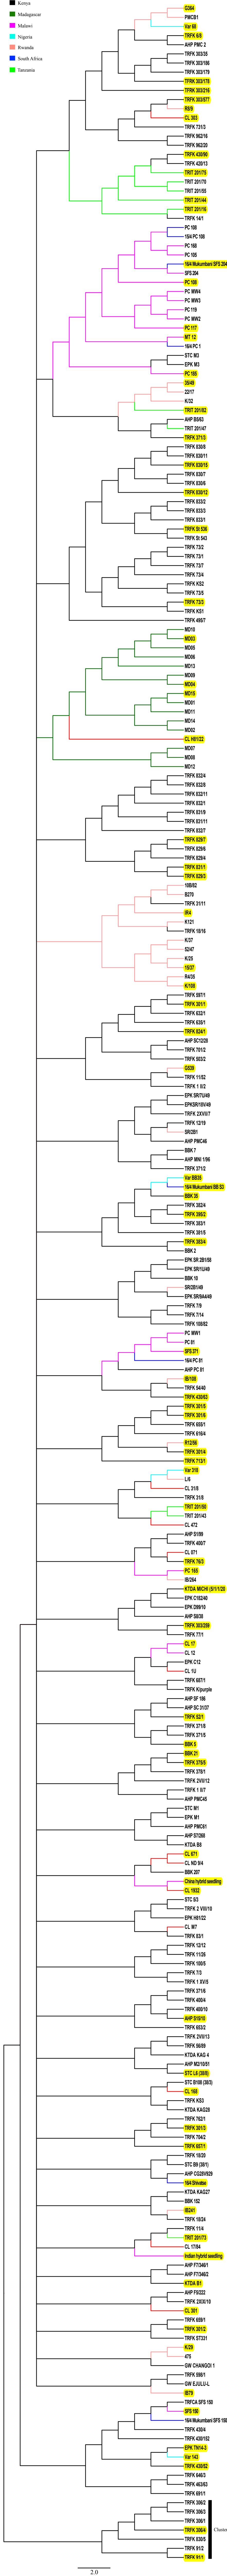

Cluster III

Cluster II

Cluster I

2.0

Figure S1: An unrooted neighbour joining tree based on Nei's genetic distances for 280 tea accessions from 8 African countries
