# Supplementary material for: Insights into the Genetic Relationships and Breeding Patterns of the African Tea Germplasm Based on nSSR Markers and cpDNA Sequences
Source: PubMed Central journal article supplement (PMC5004484; doi:10.3389/fpls.2016.01244), 2016-08-30
Supplement: Image2.pdf [file Image2.pdf]

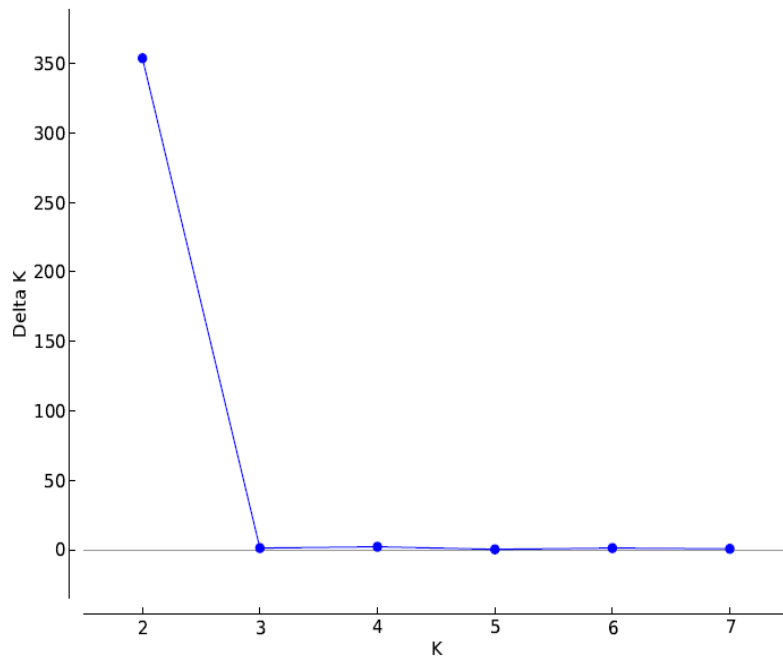

A

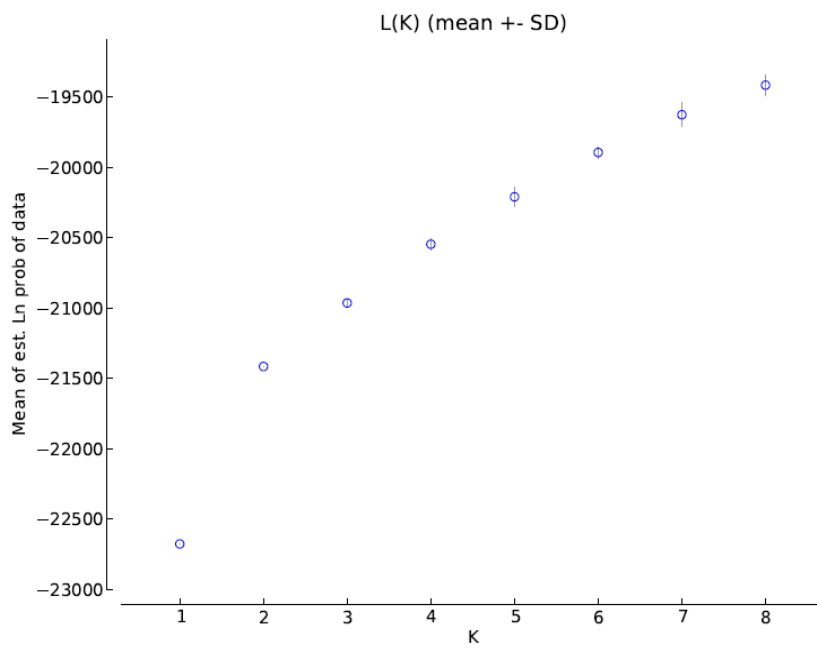

B

**Figure S2:** Estimated  $\Delta K$  (A) and  $L(K)$  (B) of 280 tea accessions from Africa over eight runs for each  $K$  value
