# Supplementary material for: Insights into the Genetic Relationships and Breeding Patterns of the African Tea Germplasm Based on nSSR Markers and cpDNA Sequences
Source: PubMed Central journal article supplement (PMC5004484; doi:10.3389/fpls.2016.01244), 2016-08-30
Supplement: Image3.pdf [file Image3.pdf]

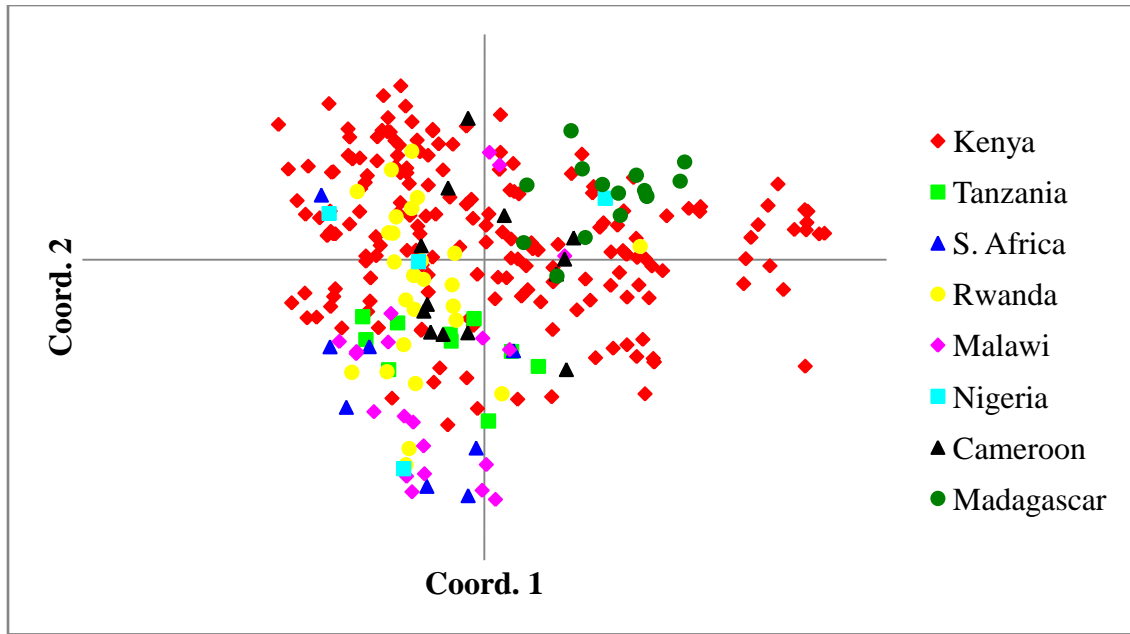

**Figure S3:** Principal coordinates analysis (PCoA) of 280 tea accessions genotyped with 23 nSSR markers.
